# Supplementary material for: Cryptosporidium parvum IId family: clonal population and dispersal from Western Asia to other geographical regions
Source: PubMed Central journal article supplement — Sci Rep. 2014 Feb 27;4:4208. doi: 10.1038/srep04208 (PMC3936226; doi:10.1038/srep04208), 2014-02-27

***Cryptosporidium parvum* IId family: clonal population and dispersal from Western Asia to other geographical regions**

Rongjun Wang<sup>1</sup>, Longxian Zhang<sup>1\*</sup>, Charlotte Axén<sup>2</sup>, Camilla Bjorkman<sup>3</sup>, Fuchun Jian<sup>1</sup>, Said Amer<sup>4</sup>, Aiqin Liu<sup>5</sup>, Yaoyu Feng<sup>6</sup>, Guoquan Li<sup>1</sup>, Chaochao Lv<sup>1</sup>, Zifang Zhao<sup>1</sup>, Meng Qi<sup>1</sup>, Haiju Dong<sup>1</sup>, Helei Wang<sup>1</sup>, Yanru Sun<sup>1</sup>, Changshen Ning<sup>1</sup> & Lihua Xiao<sup>7\*</sup>

<sup>1</sup> College of Animal Science and Veterinary Medicine, Henan Agricultural University, Zhengzhou, China. <sup>2</sup> Department for Animal Health and Antimicrobial Strategies, Swedish National Veterinary Institute, Uppsala, Sweden. <sup>3</sup> Department of Clinical Sciences, Swedish University of Agricultural Sciences, Uppsala, Sweden. <sup>4</sup> Department of Zoology, Faculty of Science, Kafr El sheikh University, Kafe El Sheikh, Egypt. <sup>5</sup> Department of Parasitology, Harbin Medical University, Harbin, China. <sup>6</sup> School of Resource and Environmental Engineering, East China University of Science and Technology, Shanghai, China. <sup>7</sup> Division of Foodborne, Waterborne, and Environmental Diseases, National Center for Emerging and Zoonotic Infectious Diseases, Centers for Disease Control and Prevention, Atlanta, USA.

\*Corresponding author. Mailing address for Longxian Zhang: College of Animal Science and Veterinary Medicine, Henan Agricultural University, Zhengzhou 450002, P. R. China. Phone: 86-371-63555689. Fax: 86-371-63558180. E-mail: zhanglx8999@yahoo.com.cn.

Mailing address for Lihua Xiao: Division of Foodborne, Waterborne, and Environmental Diseases, National Center for Emerging and Zoonotic Infectious Diseases, Centers for Disease Control and Prevention, Atlanta, GA 30333. Phone: (404) 718-4161. Fax: (404) 718-4197. E-mail: lxiao@cdc.gov.

## Supporting Information

**Figure S1** Phylogenetic network analysis of multilocus sequence typing data of 111 *C. parvum* IId isolates. The number labeled beside circle indicates the MLST as shown in table S1. Each circle indicates a unique MLST of *C. parvum* and Circle size represents the number of samples present in each MLST.

**Figure S2** Linkage disequilibrium (LD) among different populations by DnaSP analysis of concatenated sequences from 12 genetic loci.

**Figure S3** Estimate of the number of ancestral population (K). (A) Plot of the mean likelihood  $L(K)$ . (B) Plot of the mean difference between successive likelihood values of K,  $L'(K) = L(K) - L(K - 1)$ . (C) Plot of the mean differences between successive values of  $L'(K)$ , where  $|L''(K)| = |L'(K + 1) - L'(K)|$ . (D) Plot of the delta K ( $\Delta K$ ),  $\Delta K = m|L''(K)|/s[L(K)]$ , where  $m$  = mean of the absolute values of  $L''(K)$ ,  $s$  = SD of  $L(K)$ .

**Table S1** Specimens used in this study and their subtype identity at the 12 genetic loci.

**Table S2** Genetic diversity of *C. parvum* IId DNA sequences.

**Table S3** Genetic diversity of *C. parvum* IId DNA sequences at the GP60 locus.

**Table S4** Analysis of linkage disequilibrium in *C. parvum* IId isolates.

**Table S5** Background information for *C. parvum* IId isolates in Sweden.

**Table S1** Specimens used in this study and their subtype identity at the twelve loci

| Specimen ID | Host   | Country | Subtype at each locus* |      |         |         |     |      |        |      |       |         |     |      | MLST subtype |   |
|-------------|--------|---------|------------------------|------|---------|---------|-----|------|--------|------|-------|---------|-----|------|--------------|---|
|             |        |         | MSC 6-7                | RPGR | MSC 6-5 | DZ-HRGP | ZPT | CP56 | Chom3T | CP47 | HSP70 | Mucin-1 | ML2 | Gp60 |              |   |
| FY4         | cattle | China   | 1                      | 1    | 1       | 1       | 1   | 1    | 1      | 1    | 1     | 1       | 1   | 1    | 5            | 1 |
| FY6         | cattle | China   | 1                      | 1    | 1       | 1       | 1   | 1    | 1      | 1    | 1     | 1       | 1   | 1    | 5            | 1 |
| FY10        | cattle | China   | 1                      | 1    | 1       | 1       | 1   | 1    | 1      | 1    | 1     | 1       | 1   | 1    | 5            | 1 |
| FY23        | cattle | China   | 1                      | 1    | 1       | 1       | 1   | 1    | 1      | 1    | 1     | 1       | 1   | 1    | 5            | 1 |
| FY25        | cattle | China   | 1                      | 1    | 1       | 1       | 1   | 1    | 1      | 1    | 1     | 1       | 1   | 1    | 5            | 1 |
| FY41        | cattle | China   | 1                      | 1    | 1       | 1       | 1   | 1    | 1      | 1    | 1     | 1       | 1   | 1    | 5            | 1 |
| FY42        | cattle | China   | 1                      | 1    | 1       | 1       | 1   | 1    | 1      | 1    | 1     | 1       | 1   | 1    | 5            | 1 |
| FY54        | cattle | China   | 1                      | 1    | 1       | 1       | 1   | 1    | 1      | 1    | 1     | 1       | 1   | 1    | 5            | 1 |
| FY59        | cattle | China   | 1                      | 1    | 1       | 1       | 1   | 1    | 1      | 1    | 1     | 1       | 1   | 1    | 5            | 1 |
| FY67        | cattle | China   | 1                      | 1    | 1       | 1       | 1   | 1    | 1      | 1    | 1     | 1       | 1   | 1    | 5            | 1 |
| FY70        | cattle | China   | 1                      | 1    | 1       | 1       | 1   | 1    | 1      | 1    | 1     | 1       | 1   | 1    | 5            | 1 |
| FY71        | cattle | China   | 1                      | 1    | 1       | 1       | 1   | 1    | 1      | 1    | 1     | 1       | 1   | 1    | 5            | 1 |
| FY72        | cattle | China   | 1                      | 1    | 1       | 1       | 1   | 1    | 1      | 1    | 1     | 1       | 1   | 1    | 5            | 1 |
| FY76        | cattle | China   | 1                      | 1    | 1       | 1       | 1   | 1    | 1      | 1    | 1     | 1       | 1   | 1    | 5            | 1 |
| FY77        | cattle | China   | 1                      | 1    | 1       | 1       | 1   | 1    | 1      | 1    | 1     | 1       | 1   | 1    | 5            | 1 |
| FY78        | cattle | China   | 1                      | 1    | 1       | 1       | 1   | 1    | 1      | 1    | 1     | 1       | 1   | 1    | 5            | 1 |
| DY1         | cattle | China   | 1                      | 1    | 1       | 1       | 1   | 1    | 1      | 1    | 1     | 1       | 1   | 1    | 5            | 1 |
| DY2         | cattle | China   | 1                      | 1    | 1       | 1       | 1   | 1    | 1      | 1    | 1     | 1       | 1   | 1    | 5            | 1 |
| DY3         | cattle | China   | 1                      | 1    | 1       | 1       | 1   | 1    | 1      | 1    | 1     | 1       | 1   | 1    | 5            | 1 |
| DY5         | cattle | China   | 1                      | 1    | 1       | 1       | 1   | 1    | 1      | 1    | 1     | 1       | 1   | 1    | 5            | 1 |
| DY6         | cattle | China   | 1                      | 1    | 1       | 1       | 1   | 1    | 1      | 1    | 1     | 1       | 1   | 1    | 5            | 1 |
| DY14        | cattle | China   | 1                      | 1    | 1       | 1       | 1   | 1    | 1      | 1    | 1     | 1       | 1   | 1    | 5            | 1 |
| DY16        | cattle | China   | 1                      | 1    | 1       | 1       | 1   | 1    | 1      | 1    | 1     | 1       | 1   | 1    | 5            | 1 |
| DY18        | cattle | China   | 1                      | 1    | 1       | 1       | 1   | 1    | 1      | 1    | 1     | 1       | 1   | 1    | 5            | 1 |
| DY19        | cattle | China   | 1                      | 1    | 1       | 1       | 1   | 1    | 1      | 1    | 1     | 1       | 1   | 1    | 5            | 1 |
| DY23        | cattle | China   | 1                      | 1    | 1       | 1       | 1   | 1    | 1      | 1    | 1     | 1       | 1   | 1    | 5            | 1 |
| DY24        | cattle | China   | 1                      | 1    | 1       | 1       | 1   | 1    | 1      | 1    | 1     | 1       | 1   | 1    | 5            | 1 |
| DY26        | cattle | China   | 1                      | 1    | 1       | 1       | 1   | 1    | 1      | 1    | 1     | 1       | 1   | 1    | 5            | 1 |
| DY27        | cattle | China   | 1                      | 1    | 1       | 1       | 1   | 1    | 1      | 1    | 1     | 1       | 1   | 1    | 5            | 1 |
| DY28        | cattle | China   | 1                      | 1    | 1       | 1       | 1   | 1    | 1      | 1    | 1     | 1       | 1   | 1    | 5            | 1 |
| DY29        | cattle | China   | 1                      | 1    | 1       | 1       | 1   | 1    | 1      | 1    | 1     | 1       | 1   | 1    | 5            | 1 |
| DY30        | cattle | China   | 1                      | 1    | 1       | 1       | 1   | 1    | 1      | 1    | 1     | 1       | 1   | 1    | 5            | 1 |
| DY31        | cattle | China   | 1                      | 1    | 1       | 1       | 1   | 1    | 1      | 1    | 1     | 1       | 1   | 1    | 5            | 1 |
| DY32        | cattle | China   | 1                      | 1    | 1       | 1       | 1   | 1    | 1      | 1    | 1     | 1       | 1   | 1    | 5            | 1 |
| DY33        | cattle | China   | 1                      | 1    | 1       | 1       | 1   | 1    | 1      | 1    | 1     | 1       | 1   | 1    | 5            | 1 |

|       |         |        |   |   |   |   |   |   |   |   |   |   |   |   |   |
|-------|---------|--------|---|---|---|---|---|---|---|---|---|---|---|---|---|
| DY34  | cattle  | China  | 1 | 1 | 1 | 1 | 1 | 1 | 1 | 1 | 1 | 1 | 1 | 5 | 1 |
| SQ5   | cattle  | China  | 1 | 1 | 1 | 1 | 1 | 1 | 1 | 1 | 1 | 1 | 1 | 5 | 1 |
| FY52  | cattle  | China  | 1 | 1 | 1 | 2 | 1 | 1 | 1 | 1 | 1 | 1 | 1 | 5 | 2 |
| SQ1   | cattle  | China  | 1 | 1 | 1 | 2 | 1 | 1 | 1 | 1 | 1 | 1 | 1 | 5 | 2 |
| SQ2   | cattle  | China  | 1 | 1 | 1 | 2 | 1 | 1 | 1 | 1 | 1 | 1 | 1 | 5 | 2 |
| SQ3   | cattle  | China  | 1 | 1 | 1 | 2 | 1 | 1 | 1 | 1 | 1 | 1 | 1 | 5 | 2 |
| SQ4   | cattle  | China  | 1 | 1 | 1 | 2 | 1 | 1 | 1 | 1 | 1 | 1 | 1 | 5 | 2 |
| SQ7   | cattle  | China  | 1 | 1 | 1 | 2 | 1 | 1 | 1 | 1 | 1 | 1 | 1 | 5 | 2 |
| SQ8   | cattle  | China  | 1 | 1 | 1 | 2 | 1 | 1 | 1 | 1 | 1 | 1 | 1 | 5 | 2 |
| SQ9   | cattle  | China  | 1 | 1 | 1 | 2 | 1 | 1 | 1 | 1 | 1 | 1 | 1 | 5 | 2 |
| NX4   | cattle  | China  | 1 | 1 | 1 | 2 | 1 | 1 | 1 | 1 | 1 | 1 | 1 | 5 | 2 |
| NX93  | cattle  | China  | 1 | 1 | 1 | 2 | 1 | 1 | 1 | 1 | 1 | 1 | 1 | 5 | 2 |
| NX139 | cattle  | China  | 1 | 1 | 1 | 2 | 1 | 1 | 1 | 1 | 1 | 1 | 1 | 5 | 2 |
| NX140 | cattle  | China  | 1 | 1 | 1 | 2 | 1 | 1 | 1 | 1 | 1 | 1 | 1 | 5 | 2 |
| NX203 | cattle  | China  | 1 | 1 | 1 | 2 | 1 | 1 | 1 | 1 | 1 | 1 | 1 | 5 | 2 |
| M120  | horse   | China  | 1 | 1 | 1 | 2 | 1 | 1 | 1 | 1 | 1 | 1 | 1 | 5 | 2 |
| M123  | horse   | China  | 1 | 1 | 1 | 2 | 1 | 1 | 1 | 1 | 1 | 1 | 1 | 5 | 2 |
| M126  | horse   | China  | 1 | 1 | 1 | 2 | 1 | 1 | 1 | 1 | 1 | 1 | 1 | 5 | 2 |
| M218  | horse   | China  | 1 | 1 | 1 | 2 | 1 | 1 | 1 | 1 | 1 | 1 | 1 | 5 | 2 |
| M118  | horse   | China  | 1 | 1 | 1 | 2 | 3 | 1 | 1 | 1 | 1 | 1 | 1 | 5 | 3 |
| M330  | horse   | China  | 1 | 1 | 1 | 2 | 2 | 1 | 1 | 1 | 1 | 1 | 2 | 5 | 4 |
| A18   | hamster | China  | 1 | 1 | 1 | 2 | 1 | 1 | 1 | 1 | 1 | 1 | 1 | 1 | 5 |
| A19   | hamster | China  | 1 | 1 | 1 | 2 | 1 | 1 | 1 | 1 | 1 | 1 | 1 | 1 | 5 |
| ET-1  | cattle  | Egypt  | 1 | 1 | 1 | 2 | 1 | 1 | 1 | 3 | 1 | 1 | 1 | 7 | 6 |
| ET-2  | cattle  | Egypt  | 1 | 1 | 1 | 2 | 1 | 1 | 1 | 3 | 1 | 1 | 1 | 7 | 6 |
| ET-3  | cattle  | Egypt  | 1 | 1 | 1 | 2 | 1 | 1 | 1 | 3 | 1 | 1 | 1 | 7 | 6 |
| ET-4  | cattle  | Egypt  | 1 | 1 | 1 | 2 | 1 | 1 | 1 | 3 | 1 | 1 | 1 | 7 | 6 |
| ET-5  | cattle  | Egypt  | 1 | 1 | 1 | 2 | 1 | 1 | 1 | 3 | 1 | 1 | 1 | 7 | 6 |
| ET-6  | cattle  | Egypt  | 1 | 1 | 1 | 2 | 1 | 1 | 1 | 3 | 1 | 1 | 1 | 7 | 6 |
| ET-7  | cattle  | Egypt  | 1 | 1 | 1 | 2 | 1 | 1 | 1 | 3 | 1 | 1 | 1 | 7 | 6 |
| ET-8  | cattle  | Egypt  | 1 | 1 | 1 | 2 | 1 | 1 | 1 | 3 | 1 | 1 | 1 | 7 | 6 |
| ET-9  | cattle  | Egypt  | 1 | 1 | 1 | 2 | 1 | 1 | 1 | 3 | 1 | 1 | 1 | 7 | 6 |
| ET-10 | cattle  | Egypt  | 1 | 1 | 1 | 2 | 1 | 1 | 1 | 3 | 1 | 1 | 1 | 7 | 6 |
| SN-01 | cattle  | Sweden | 3 | 1 | 1 | 7 | 1 | 2 | 1 | 2 | 2 | 3 | 5 | 5 | 7 |
| SN-02 | cattle  | Sweden | 3 | 1 | 1 | 7 | 1 | 2 | 1 | 2 | 2 | 3 | 5 | 5 | 7 |
| SN-03 | cattle  | Sweden | 3 | 1 | 1 | 7 | 1 | 2 | 1 | 2 | 2 | 3 | 5 | 9 | 8 |
| SN-04 | cattle  | Sweden | 3 | 1 | 1 | 7 | 1 | 2 | 1 | 2 | 2 | 3 | 5 | 9 | 8 |
| SN-13 | cattle  | Sweden | 3 | 1 | 1 | 7 | 1 | 2 | 4 | 2 | 2 | 3 | 4 | 9 | 9 |
| SN-42 | cattle  | Sweden | 3 | 1 | 1 | 7 | 1 | 2 | 4 | 2 | 2 | 3 | 4 | 9 | 9 |
| SN-43 | cattle  | Sweden | 3 | 1 | 1 | 7 | 1 | 2 | 4 | 2 | 2 | 3 | 4 | 9 | 9 |

|       |        |        |   |   |   |   |   |   |   |   |   |   |   |    |    |
|-------|--------|--------|---|---|---|---|---|---|---|---|---|---|---|----|----|
| SN-44 | cattle | Sweden | 2 | 1 | 1 | 7 | 1 | 2 | 4 | 2 | 2 | 3 | 4 | 9  | 10 |
| SN-10 | cattle | Sweden | 3 | 1 | 1 | 4 | 1 | 2 | 4 | 2 | 2 | 3 | 5 | 8  | 11 |
| SN-11 | cattle | Sweden | 3 | 1 | 1 | 7 | 1 | 2 | 5 | 2 | 2 | 3 | 5 | 8  | 12 |
| SN-12 | cattle | Sweden | 3 | 1 | 1 | 7 | 1 | 2 | 5 | 2 | 2 | 3 | 5 | 8  | 12 |
| SN-28 | cattle | Sweden | 3 | 1 | 1 | 7 | 1 | 2 | 2 | 2 | 2 | 3 | 5 | 8  | 13 |
| SN-29 | cattle | Sweden | 3 | 1 | 1 | 7 | 1 | 2 | 2 | 2 | 2 | 3 | 5 | 8  | 13 |
| SN-30 | cattle | Sweden | 3 | 1 | 1 | 7 | 1 | 2 | 2 | 2 | 2 | 3 | 5 | 8  | 13 |
| SN-31 | cattle | Sweden | 3 | 1 | 1 | 7 | 1 | 2 | 2 | 2 | 2 | 3 | 5 | 8  | 13 |
| SN-14 | cattle | Sweden | 3 | 1 | 1 | 4 | 1 | 2 | 4 | 2 | 2 | 4 | 5 | 8  | 14 |
| SN-17 | cattle | Sweden | 4 | 1 | 2 | 3 | 1 | 2 | 3 | 3 | 2 | 2 | 3 | 2  | 15 |
| SN-18 | cattle | Sweden | 4 | 1 | 2 | 3 | 1 | 2 | 3 | 3 | 2 | 2 | 3 | 2  | 15 |
| SN-19 | cattle | Sweden | 4 | 1 | 2 | 3 | 1 | 2 | 3 | 3 | 2 | 2 | 3 | 2  | 15 |
| SN-24 | cattle | Sweden | 4 | 1 | 2 | 3 | 1 | 2 | 3 | 3 | 2 | 2 | 3 | 2  | 15 |
| SN-39 | cattle | Sweden | 3 | 1 | 1 | 7 | 1 | 2 | 1 | 2 | 2 | 3 | 5 | 3  | 16 |
| SN-20 | cattle | Sweden | 5 | 1 | 1 | 5 | 1 | 2 | 4 | 4 | 2 | 3 | 5 | 4  | 17 |
| SN-21 | cattle | Sweden | 3 | 1 | 1 | 5 | 1 | 2 | 4 | 4 | 2 | 3 | 5 | 4  | 18 |
| SN-22 | cattle | Sweden | 3 | 1 | 1 | 7 | 1 | 2 | 1 | 2 | 2 | 3 | 4 | 11 | 19 |
| SN-23 | cattle | Sweden | 3 | 1 | 1 | 7 | 1 | 2 | 2 | 2 | 2 | 3 | 4 | 11 | 20 |
| SN-25 | cattle | Sweden | 3 | 1 | 1 | 7 | 1 | 2 | 4 | 2 | 2 | 3 | 5 | 10 | 21 |
| SN-26 | cattle | Sweden | 3 | 1 | 1 | 7 | 1 | 2 | 4 | 2 | 2 | 3 | 5 | 10 | 21 |
| SN-16 | cattle | Sweden | 3 | 1 | 1 | 7 | 1 | 2 | 4 | 2 | 2 | 3 | 4 | 10 | 22 |
| SN-32 | cattle | Sweden | 3 | 1 | 1 | 7 | 1 | 2 | 5 | 2 | 2 | 3 | 5 | 6  | 23 |
| SN-33 | cattle | Sweden | 3 | 1 | 1 | 7 | 1 | 2 | 5 | 2 | 2 | 3 | 5 | 6  | 23 |
| SN-40 | cattle | Sweden | 3 | 1 | 1 | 7 | 1 | 2 | 5 | 2 | 2 | 3 | 5 | 6  | 23 |
| SN-41 | cattle | Sweden | 3 | 1 | 1 | 7 | 1 | 2 | 5 | 2 | 2 | 3 | 5 | 6  | 23 |
| SN-34 | cattle | Sweden | 3 | 1 | 1 | 7 | 1 | 2 | 4 | 2 | 2 | 3 | 5 | 6  | 24 |
| SN-35 | cattle | Sweden | 3 | 1 | 1 | 7 | 1 | 2 | 4 | 2 | 2 | 3 | 5 | 6  | 24 |
| SN-36 | cattle | Sweden | 3 | 1 | 1 | 7 | 1 | 2 | 4 | 2 | 2 | 3 | 5 | 6  | 24 |
| SN-37 | cattle | Sweden | 3 | 1 | 1 | 7 | 1 | 2 | 4 | 2 | 2 | 3 | 5 | 6  | 24 |
| SN-38 | cattle | Sweden | 3 | 1 | 1 | 7 | 1 | 2 | 4 | 2 | 2 | 3 | 5 | 6  | 24 |
| SN-45 | cattle | Sweden | 3 | 1 | 1 | 7 | 1 | 2 | 4 | 2 | 2 | 3 | 5 | 6  | 24 |
| SN-05 | cattle | Sweden | 3 | 1 | 1 | 6 | 1 | 2 | 5 | 2 | 2 | 3 | 5 | 6  | 25 |
| SN-06 | cattle | Sweden | 3 | 1 | 1 | 6 | 1 | 2 | 5 | 2 | 2 | 3 | 5 | 6  | 25 |
| SN-07 | cattle | Sweden | 3 | 1 | 1 | 6 | 1 | 2 | 5 | 2 | 2 | 3 | 5 | 6  | 25 |
| SN-08 | cattle | Sweden | 3 | 1 | 1 | 6 | 1 | 2 | 5 | 2 | 2 | 3 | 5 | 6  | 25 |
| SN-09 | cattle | Sweden | 3 | 1 | 1 | 6 | 1 | 2 | 5 | 2 | 2 | 3 | 5 | 6  | 25 |

\*Subtypes 1-11 at the gp60 gene respectively represent IIdA15G1, IIdA16G1, IIdA17G1, IIdA17G1, IIdA19G1, IIdA20G1e, IIdA20G1f, IIdA22G1, IIdA23G1, IIdA24G1, and IIdA26G1.

**Table S2** Genetic diversity of *C. parvum* IId DNA sequences at 12 loci

| <b>Source</b> | <b>Number of sequences</b> | <b>No. of polymorphic (segregating) sites, S</b> | <b>No. of haplotypes, h</b> | <b>Haplotype diversity, Hd</b> | <b>Nucleotide diversity, Pi</b> | <b>Average number of nucleotide differences, k</b> |
|---------------|----------------------------|--------------------------------------------------|-----------------------------|--------------------------------|---------------------------------|----------------------------------------------------|
| China         | 58                         | 27                                               | 3                           | 0.06836                        | 0.00014                         | 0.93103                                            |
| Sweden        | 43                         | 76                                               | 8                           | 0.71429                        | 0.00223                         | 15.27353                                           |
| Egypt         | 10                         | 0                                                | 1                           | 0.00000                        | 0.00000                         | 0.0000                                             |

**Table S3** Genetic diversity of *C. parvum* IId DNA sequences at the GP60 locus

| Source                                                                                      | Number of sequences* | No. of polymorphic (segregating) sites, S | No. of haplotypes, h | Haplotype diversity, Hd | Nucleotide diversity, Pi | Average number of nucleotide differences, k |
|---------------------------------------------------------------------------------------------|----------------------|-------------------------------------------|----------------------|-------------------------|--------------------------|---------------------------------------------|
| Western Asia (Iran, Jordan, and Kuwait)                                                     | 13                   | 7                                         | 8                    | 0.859                   | 0.00267                  | 2.128                                       |
| Europe (United Kingdom, Spain, Netherland, Belgium, Portugal, Sweden, Ireland, and Romania) | 22                   | 6                                         | 7                    | 0.697                   | 0.00252                  | 1.255                                       |
| Other countries in Asia (China, India, Malaysia)                                            | 4                    | 0                                         | 1                    | 0.000                   | 0.00000                  | 0.000                                       |
| Egypt                                                                                       | 2                    | 1                                         | 2                    | 1.000                   | 0.00116                  | 1.000                                       |
| Australia                                                                                   | 2                    | 1                                         | 2                    | 1.000                   | 0.00112                  | 1.000                                       |

\*The 43 GP60 sequences represent 15 *C. parvum* IId subtypes in various countries downloaded from the NCBI database, including IIdA14G1, IIdA15G1, IIdA16G1, IIdA17G1, IIdA18G1, IIdA19G1, IIdA20G1, IIdA21G1, IIdA22G1, IIdA23G1, IIdA24G1, IIdA25G1, IIdA26G1, IIdA28G1, and IIdA29G1. The accession numbers of GP60 sequences used include AB560748, AB560740, AB560742, AB560743, AB560746, AY738185, AY738186, AY738189, AY738194, AY738193, AB560745, GU458803, EU549718, EU549717, EF576976, HQ005740, DQ280495, EF576975, HQ005740, DQ280496, JQ028866, DQ280497, AY166806, FJ917374, FJ917376, HQ005750, EU868625, JQ028865, EU549714, JX183810, JX043492, EU549712, EU549713, JX183811, HQ631423, GQ121027, HQ009809, JF495152, HQ241928, JF727762, FJ839877, AB514086, and AB514086.

**Table S4** Analysis of linkage disequilibrium in *C. parvum* IId isolates

| <b>Group</b>                      | <b>No. of completely typed</b> | <b>Standardized index of association (<math>I_A^S</math>)</b> | <b><math>V_D &gt; L</math></b> | <b>Significance statistic</b> |
|-----------------------------------|--------------------------------|---------------------------------------------------------------|--------------------------------|-------------------------------|
| Overall (China, Sweden and Egypt) | 111                            | 0.5591                                                        | Yes                            | P < 0.001                     |
| China                             | 58                             | 0.0297                                                        | Yes                            | P = 0.004                     |
| Sweden                            | 43                             | 0.2733                                                        | Yes                            | P < 0.001                     |

**Note:**  $V_D$  = the pairwise variance,  $L$  = 95% critical value.



**Table S5.** Background information for *C. parvum* IId specimens in Sweden

| <b>Specimen ID</b> | <b>City (Province)</b>    | <b>Farm No.</b> | <b>GP60 subtype</b> | <b>MLST subtype</b> |
|--------------------|---------------------------|-----------------|---------------------|---------------------|
| SN5                | Falkoping (Vastergotland) | 1               | IIdA20G1            | 25                  |
| SN6                | Falkoping (Vastergotland) | 1               | IIdA20G1            | 25                  |
| SN7                | Falkoping (Vastergotland) | 1               | IIdA20G1            | 25                  |
| SN8                | Falkoping (Vastergotland) | 1               | IIdA20G1            | 25                  |
| SN9                | Falkoping (Vastergotland) | 1               | IIdA20G1            | 25                  |
| SN10               | Falkoping (Vastergotland) | 2               | IIdA22G1            | 11                  |
| SN14               | Skara (Vastergotland)     | 2               | IIdA22G1            | 14                  |
| SN1                | Skara (Vastergotland)     | 3               | IIdA19G1            | 7                   |
| SN2                | Skara (Vastergotland)     | 3               | IIdA19G1            | 7                   |
| SN39               | Toreboda (Vastergotland)  | 4               | IIdA16G1            | 16                  |
| SN11               | Angelholm (Skane)         | 5               | IIdA22G1            | 12                  |
| SN12               | Angelholm (Skane)         | 5               | IIdA22G1            | 12                  |
| SN13               | Angelholm (Skane)         | 6               | IIdA23G1            | 9                   |
| SN17               | Angelholm (Skane)         | 7               | IIdA16G1            | 15                  |
| SN18               | Angelholm (Skane)         | 7               | IIdA16G1            | 15                  |
| SN19               | Angelholm (Skane)         | 7               | IIdA16G1            | 15                  |
| SN24               | Angelholm (Skane)         | 8               | IIdA16G1            | 15                  |
| SN36               | Angelholm (Skane)         | 9               | IIdA20G1            | 24                  |
| SN37               | Angelholm (Skane)         | 9               | IIdA20G1            | 24                  |
| SN38               | Angelholm (Skane)         | 9               | IIdA20G1            | 24                  |
| SN45               | Angelholm (Skane)         | 9               | IIdA20G1            | 24                  |
| SN28               | Laholm (Skane)            | 10              | IIdA22G1            | 13                  |
| SN29               | Laholm (Skane)            | 11              | IIdA22G1            | 13                  |
| SN30               | Laholm (Skane)            | 11              | IIdA22G1            | 13                  |
| SN31               | Laholm (Skane)            | 11              | IIdA22G1            | 13                  |
| SN40               | Degeberga (Skane)         | 12              | IIdA20G1            | 23                  |
| SN41               | Degeberga (Skane)         | 12              | IIdA20G1            | 23                  |
| SN42               | Vinslov (Skane)           | 6               | IIdA23G1            | 9                   |
| SN43               | Vinslov (Skane)           | 6               | IIdA23G1            | 9                   |
| SN44               | Vinslov (Skane)           | 6               | IIdA23G1            | 10                  |
| SN3                | Vaxjo (Smaland)           | 13              | IIdA23G1            | 8                   |
| SN4                | Vaxjo (Smaland)           | 13              | IIdA23G1            | 8                   |
| SN16               | Kalmar (Smaland)          | 14              | IIdA24G1            | 22                  |
| SN25               | Kalmar (Smaland)          | 15              | IIdA24G1            | 21                  |
| SN26               | Kalmar (Smaland)          | 15              | IIdA24G1            | 21                  |
| SN32               | Forsheda (Smaland)        | 16              | IIdA20G1            | 23                  |
| SN33               | Forsheda (Smaland)        | 16              | IIdA20G1            | 23                  |
| SN20               | Linkoping (Ostergotland)  | 17              | IIdA17G1            | 17                  |
| SN21               | Linkoping (Ostergotland)  | 17              | IIdA17G1            | 18                  |
| SN22               | Uppsala (Uppland)         | 18              | IIdA26G1            | 19                  |
| SN23               | Uppsala (Uppland)         | 18              | IIdA26G1            | 20                  |
| SN34               | Falkenberg (Halland)      | 19              | IIdA20G1            | 24                  |
| SN35               | Falkenberg (Halland)      | 19              | IIdA20G1            | 24                  |

Figure S1

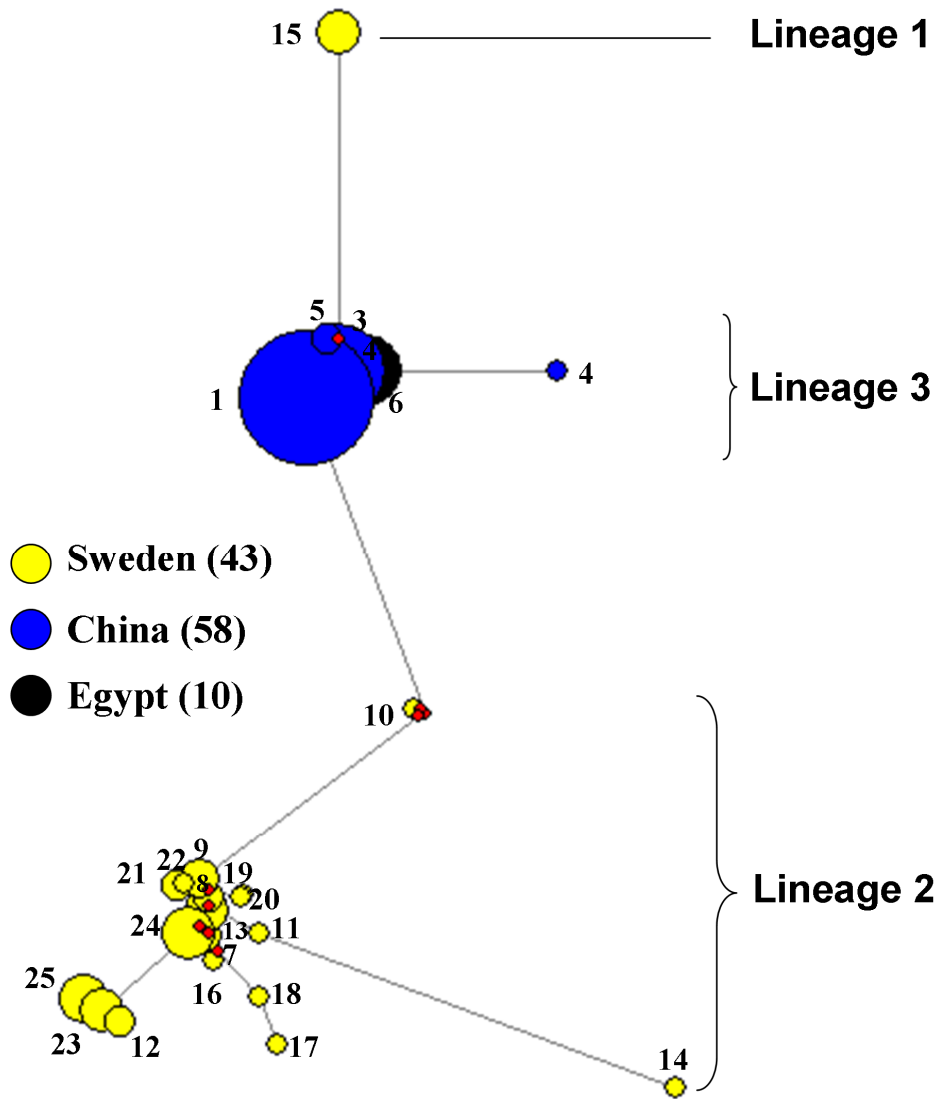

**Figure S2**

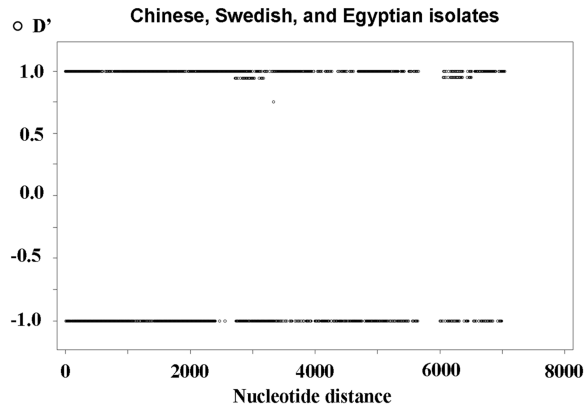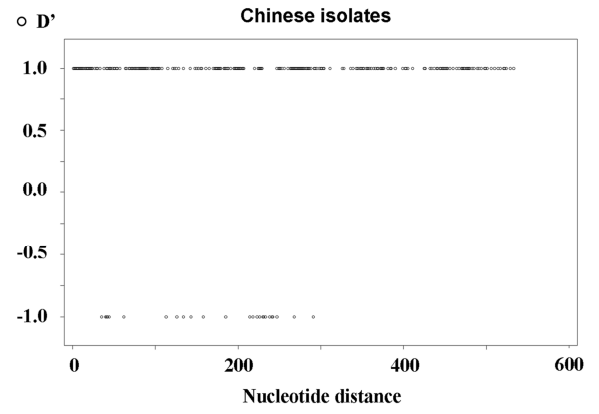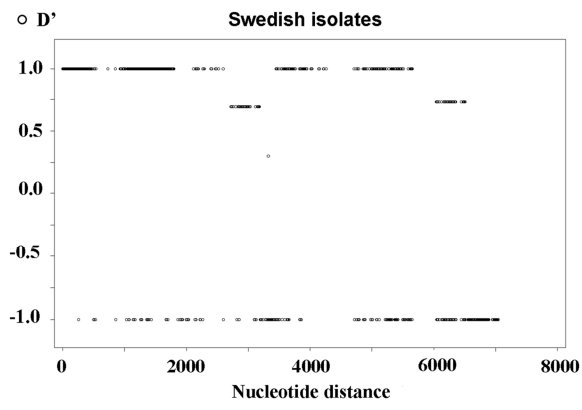

Figure S3

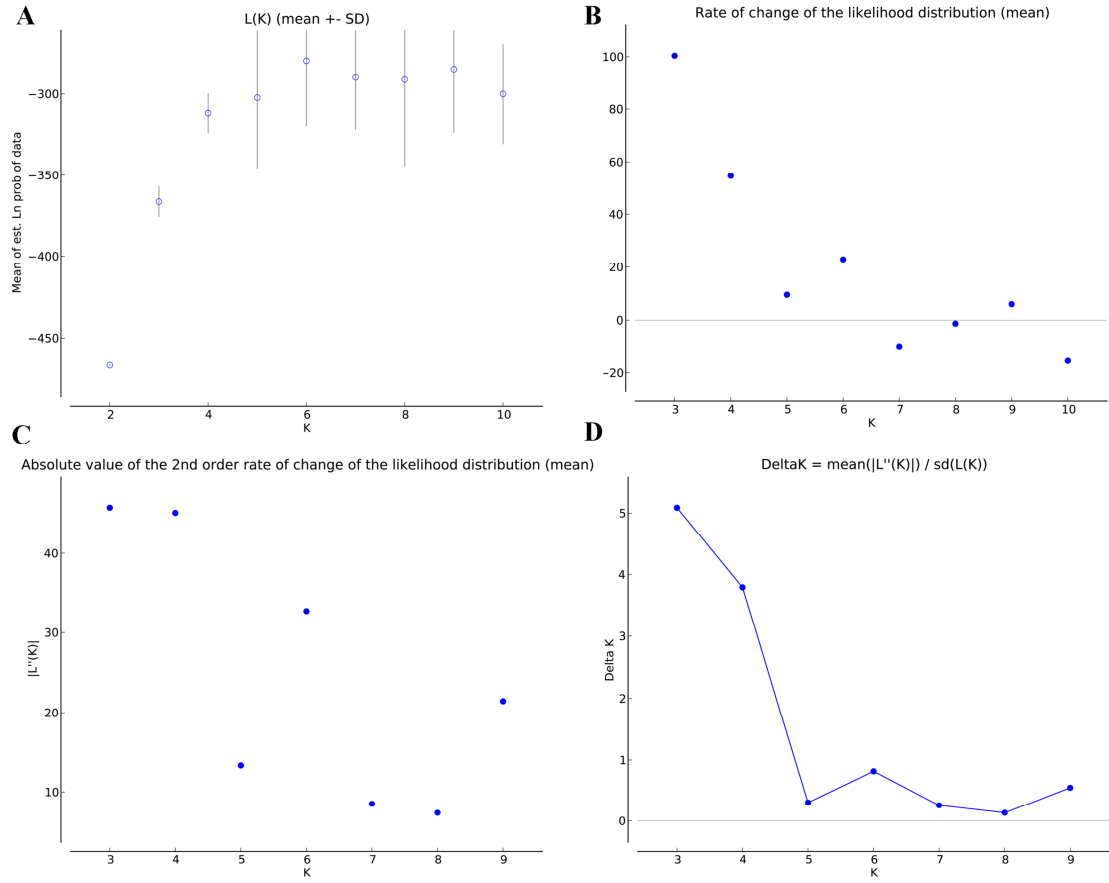

Supplement: srep04208-s1.pdf [file srep04208-s1.pdf]
